# Supplementary material for: Determination of solubility parameters of single-walled and double-walled carbon nanotubes using a finite-length model
Source: Royal Society of Chemistry journal article supplement (doi:10.1039/c3ra40382c), 2013-01-01
Supplement: c3ra40382c.pdf [file c3ra40382c.pdf]

## Electronic Supplementary Information

“Determination of solubility parameters of single-walled and double-walled carbon nanotubes using a finite-length model”

Kunsil Lee, Hyeong Jun Lim, Seung Jae Yang, Yern Seung Kim, and Chong Rae Park \*

Carbon Nanomaterials Design Laboratory, Global Research Laboratory, Research Institute of Advanced Materials, and Department of Materials Science and Engineering, Seoul National University, Seoul 151-744, Republic of Korea.

e-mail : [crpark@snu.ac.kr](mailto:crpark@snu.ac.kr)

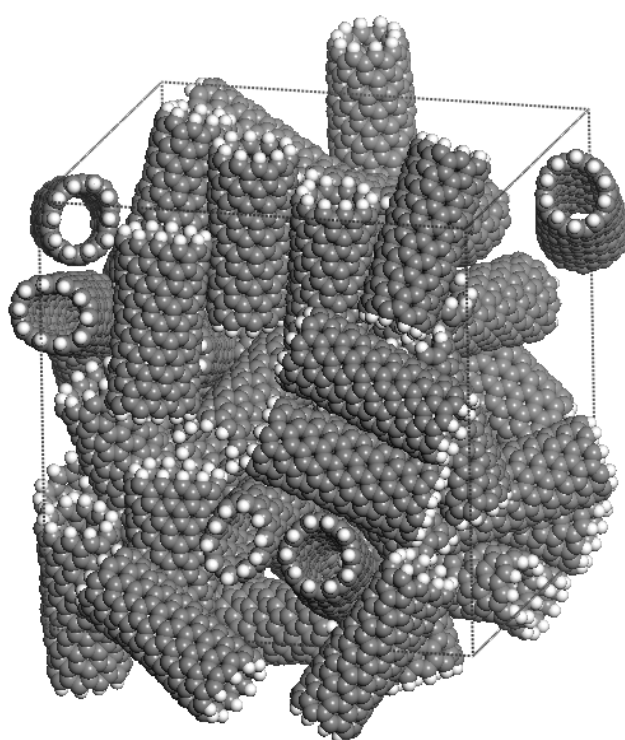

**Figure S1.** Configuration of the cell containing fifty (10,0) SWCNTs.

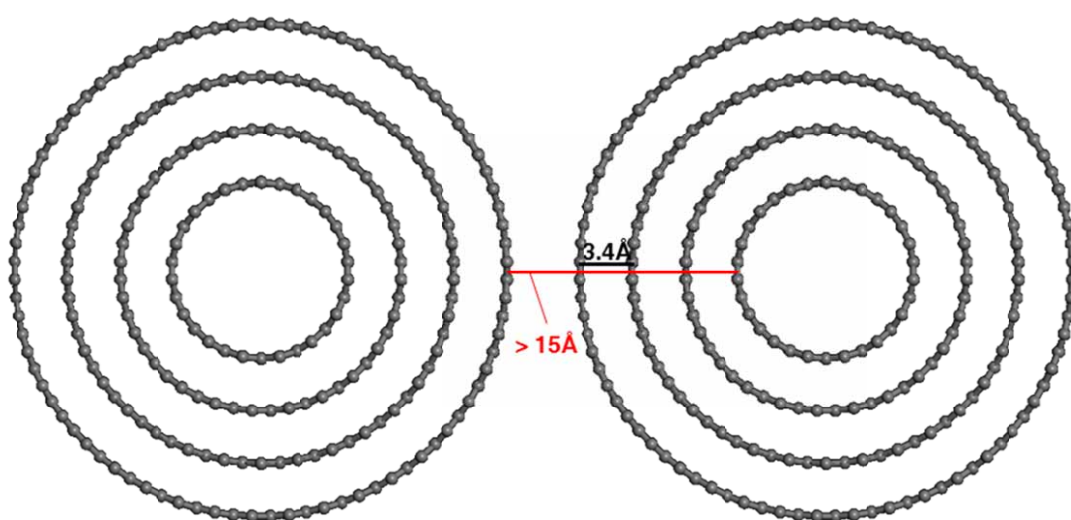

**Figure S2.** The distance between an atom of outer-most (first) wall in a MWCNT and an atom of fourth wall in another MWCNT.

**Table S1.** Determined solubility parameters for (6,6) and (10,0) SWCNTs as a function of the length

| CNT            | Diameter [nm] | Length [nm] | Density [g/cm <sup>3</sup> ] | $\delta$ [(J/cm <sup>3</sup> ) <sup>1/2</sup> ] | $\delta_{vdw}$ [(J/cm <sup>3</sup> ) <sup>1/2</sup> ] | $\delta_{es}$ [(J/cm <sup>3</sup> ) <sup>1/2</sup> ] |
|----------------|---------------|-------------|------------------------------|-------------------------------------------------|-------------------------------------------------------|------------------------------------------------------|
| (6,6) SWCNT-1  | 0.81          | 0.24        | 0.96                         | 19.54                                           | 19.29                                                 | 3.15                                                 |
| (6,6) SWCNT-2  | 0.81          | 0.49        | 1.15                         | 18.66                                           | 18.23                                                 | 4.00                                                 |
| (6,6) SWCNT-3  | 0.81          | 0.74        | 1.27                         | 18.63                                           | 18.46                                                 | 2.47                                                 |
| (6,6) SWCNT-4  | 0.81          | 0.98        | 1.34                         | 18.76                                           | 18.72                                                 | 1.33                                                 |
| (6,6) SWCNT-5  | 0.81          | 1.23        | 1.40                         | 18.93                                           | 18.88                                                 | 1.47                                                 |
| (6,6) SWCNT-6  | 0.81          | 1.48        | 1.43                         | 18.99                                           | 18.97                                                 | 1.09                                                 |
| (6,6) SWCNT-7  | 0.81          | 1.72        | 1.44                         | 18.76                                           | 18.72                                                 | 1.22                                                 |
| (6,6) SWCNT-8  | 0.81          | 1.97        | 1.45                         | 18.69                                           | 18.68                                                 | 0.54                                                 |
| (6,6) SWCNT-9  | 0.81          | 2.21        | 1.45                         | 18.46                                           | 18.50                                                 | 0                                                    |
| (6,6) SWCNT-10 | 0.81          | 2.46        | 1.45                         | 18.31                                           | 18.30                                                 | 0.74                                                 |
| (6,6) SWCNT-11 | 0.81          | 2.70        | 1.46                         | 18.28                                           | 18.26                                                 | 0.80                                                 |
| (6,6) SWCNT-12 | 0.81          | 2.95        | 1.44                         | 17.90                                           | 17.88                                                 | 0.88                                                 |
| (10,0) SWCNT-1 | 0.78          | 0.43        | 1.10                         | 17.73                                           | 17.33                                                 | 3.71                                                 |
| (10,0) SWCNT-2 | 0.78          | 0.85        | 1.27                         | 17.80                                           | 17.72                                                 | 1.67                                                 |
| (10,0) SWCNT-3 | 0.78          | 1.28        | 1.38                         | 18.36                                           | 18.38                                                 | 0                                                    |
| (10,0) SWCNT-4 | 0.78          | 1.70        | 1.44                         | 18.52                                           | 18.54                                                 | 0                                                    |
| (10,0) SWCNT-5 | 0.78          | 2.13        | 1.43                         | 18.07                                           | 18.13                                                 | 0                                                    |
| (10,0) SWCNT-6 | 0.78          | 2.56        | 1.42                         | 17.58                                           | 17.56                                                 | 0.82                                                 |
| (10,0) SWCNT-7 | 0.78          | 2.98        | 1.41                         | 17.14                                           | 17.14                                                 | 0.43                                                 |

**Table S2.** Determined solubility parameters for SWCNTs and DWCNTs as a function of the diameter

| CNT                  | Diameter [nm] | Length [nm] | Density [g/cm <sup>3</sup> ] | $\delta$ [(J/cm <sup>3</sup> ) <sup>1/2</sup> ] | $\delta_{\text{vdW}}$ [(J/cm <sup>3</sup> ) <sup>1/2</sup> ] | $\delta_{\text{es}}$ [(J/cm <sup>3</sup> ) <sup>1/2</sup> ] |
|----------------------|---------------|-------------|------------------------------|-------------------------------------------------|--------------------------------------------------------------|-------------------------------------------------------------|
| (6,0) SWCNT-5        | 0.47          | 2.13        | 1.52                         | 19.70                                           | 19.70                                                        | 0.18                                                        |
| (10,0) SWCNT-5       | 0.78          | 2.13        | 1.43                         | 18.07                                           | 18.13                                                        | 0                                                           |
| (15,0) SWCNT-5       | 1.17          | 2.13        | 1.32                         | 16.95                                           | 16.93                                                        | 0.65                                                        |
| (6,0)(15,0) DWCNT-5  | 1.17          | 2.13        | 1.49                         | 22.77                                           | 22.88                                                        | 0                                                           |
| (15,0)(24,0) DWCNT-5 | 1.88          | 2.13        | 1.43                         | 22.63                                           | 22.79                                                        | 0                                                           |
| (24,0)(33,0) DWCNT-5 | 2.58          | 2.13        | 1.40                         | 21.96                                           | 22.08                                                        | 0                                                           |
